## **Evaluation of mitochondrial DNA copy number estimation techniques**

Longchamps RJ<sup>1</sup>, Castellani CA<sup>1</sup>, Newcomb CE<sup>1</sup>, Sumpter JA<sup>1</sup>, Lane J<sup>2</sup>, Grove ML<sup>3</sup>, Guallar E<sup>4</sup>, Pankratz N<sup>2</sup>, Taylor KD<sup>5</sup>, Rotter JI<sup>5</sup>, Boerwinkle E<sup>3,6</sup>, Arking DE<sup>1\*</sup>

1) McKusick-Nathans Institute of Genetic Medicine, Johns Hopkins School of Medicine, Baltimore, MD

2) Department of Laboratory Medicine and Pathology, University of Minnesota Medical School, Minneapolis, MN

3) Human Genetics Center, Department of Epidemiology, Human Genetics, and Environmental Sciences, School of Public Health, The University of Texas Health Science Center at Houston, Houston, TX

4) Department of Epidemiology and the Welch Center for Prevention, Epidemiology and Clinical Research, Johns Hopkins Bloomberg School of Public Health, Baltimore, MD

5) Institute for Translational Genomics and Population Sciences, LABioMed and Department of Pediatrics, at Harbor-UCLA Medical Center, Torrance, CA

6) Baylor College of Medicine, Human Genome Sequencing Center, Houston, TX

\* Corresponding Author [arking@jhmi.edu](mailto:arking@jhmi.edu)

## Abstract

Mitochondrial DNA copy number (mtDNA-CN), a measure of the number of mitochondrial genomes per cell, is a minimally invasive proxy measure for mitochondrial function and has been associated with several aging-related diseases. Although quantitative real-time PCR (qPCR) is the gold standard method for measuring mtDNA-CN, mtDNA-CN can also be measured from genotyping microarray probe intensities and DNA sequencing read counts. To conduct a comprehensive examination on the performance of these methods, we use known mtDNA-CN correlates (age, sex, white blood cell count, Duffy locus, incident cardiovascular disease) to evaluate mtDNA-CN calculated from qPCR, two microarray platforms, as well as whole genome (WGS) and whole exome sequence data across 1,085 participants from the Atherosclerosis Risk in Communities (ARIC) study and 3,489 participants from the Multi-Ethnic Study of Atherosclerosis (MESA). We observe mtDNA-CN derived from WGS data is significantly more associated with known correlates compared to all other methods ( $p < 0.001$ ). Additionally, mtDNA-CN measured from WGS is on average more significantly associated with traits by 5.6 orders of magnitude and has effect size estimates 5.8 times more extreme than the current gold standard of qPCR. We further investigated the role of DNA extraction method on mtDNA-CN estimate reproducibility and found mtDNA-CN estimated from cell lysate is significantly less variable than traditional phenol-chloroform-isoamyl alcohol ( $p = 5.44 \times 10^{-4}$ ) and silica-based column selection ( $p = 2.82 \times 10^{-7}$ ). In conclusion, we recommend the field moves towards more accurate methods for mtDNA-CN, as well as re-analyze trait associations as more WGS data becomes available from larger initiatives such as TOPMed.

## Introduction

Mitochondrial dysfunction has long been known to play an important role in the underlying etiology of several aging-related diseases, including cardiovascular disease (CVD), neurodegenerative disorders and cancer<sup>1</sup>. As an easily measurable and accessible proxy for

mitochondrial function, mitochondrial DNA copy number (mtDNA-CN) is increasingly used to assess the role of mitochondria in disease. Several population-based studies have shown higher levels of mtDNA-CN to be associated with decreased incidence for CVD and its component parts: coronary artery disease (CAD) and stroke<sup>2,3</sup>; neurodegenerative disorders such as Parkinson's and Alzheimer's<sup>4,5</sup>; as well as several types of cancer including breast, kidney, liver and colorectal<sup>6-8</sup>. Furthermore, mtDNA-CN measured from peripheral blood has consistently been shown to be higher in women, decline with age, and correlate negatively with white blood cell (WBC) count<sup>9-11</sup>.

Although the mtDNA-CN field is relatively young, the number of publications has been steadily increasing at an average rate of 12% per year since 2015<sup>12</sup>. However, there has yet to be a rigorous examination of the various methods for measuring this novel phenotype and the factors which may influence its accurate estimation. Without such an examination, studies may be severely underestimating or misrepresenting the relationship of mtDNA-CN with their traits of interest.

Quantitative real-time PCR (qPCR) has been the most widely used method for measuring mtDNA-CN, partly due to its low cost and quick turnaround time. However, recent work has demonstrated the feasibility of accurately measuring mtDNA-CN from preexisting microarray, whole exome sequencing (WES) and whole genome sequencing (WGS) data<sup>2,10,13</sup>. With these advances, it is important for the field to evaluate these methods in the context of the current gold standard.

In addition to the method for determining mtDNA-CN, it is important to consider the impact of DNA extraction method on mtDNA-CN, particularly due to the small size and circular nature of the mitochondrial genome. Previous research has shown organic solvent extraction is more

accurate than silica-based methods at measuring mtDNA-CN, which is unsurprising as column kit parameters are typically optimized for DNA fragments  $\geq 50$  Kb<sup>14</sup>. However, as all DNA extraction methods have bias in the DNA which they target, measuring mtDNA-CN from direct cell lysate may prove to be a more accurate method.

In the present study, we assess the relative performance of various methods for measuring mtDNA-CN and the effects of DNA extraction on mtDNA-CN estimation accuracy. We leverage mtDNA-CN calculated across 4,574 individuals from two prospective cohorts, the Atherosclerosis Risk in Communities study (ARIC) and the Multi-Ethnic Study of Atherosclerosis study (MESA). Using mtDNA-CN estimates calculated from qPCR, WES, WGS, and two microarray platforms – the Affymetrix Genome-Wide Human SNP Array 6.0 and the Illumina HumanExome BeadChip genotyping array – we compare associations for known correlates of mtDNA-CN including age, sex, white blood cell count, the Duffy locus and incident CVD to determine the optimal method for calculating copy number. We additionally determined the reproducibility of mtDNA-CN measurements *in vitro* from three separate DNA extraction methods: silica-based column selection, organic solvent extraction (phenol-chloroform-isoamyl alcohol), and measuring mtDNA-CN from direct cell lysis without performing a traditional DNA extraction. We hypothesized that mtDNA-CN calculated from WGS data would outperform other estimation methods and mtDNA-CN measured from direct cell lysate would be more accurate than traditional DNA extraction methods.

## Methods

### *Study Populations*

The ARIC study recruited 15,792 individuals between 1987 and 1989 aged 45 to 65 years from 4 US communities. DNA for mtDNA-CN estimation was collected from different visits and was derived from buffy coat using the Gentra Puregene Blood Kit (Qiagen). Our analyses were

limited to 1,085 individuals with mtDNA-CN data available across all four platforms performed within ARIC: Affymetrix Genome-Wide Human SNP Array 6.0, Illumina HumanExome BeadChip genotyping array, WES and WGS. Eighty-eight percent of our final ARIC participants were African American.

The MESA study recruited 6,814 individuals free of prevalent clinical CVD from 6 US communities across 4 ethnicities. Age range at baseline was 45 to 84 and the baseline exam occurred between 2000 and 2002. DNA for mtDNA-CN analyses was isolated from exam 1 peripheral leukocytes using the Gentra Puregene Blood Kit. Our analyses were restricted to 3,489 white and African American (36%) individuals with mtDNA-CN data available across the three platforms with mtDNA-CN data available at the time of analysis: qPCR, Affymetrix Genome-Wide Human SNP Array 6.0 and Illumina HumanExome BeadChip genotyping array.

All participants provided written informed consent and all centers obtained approval from their respective institutional review boards.

### *Measurement of mtDNA-CN*

#### qPCR

mtDNA-CN was determined using a multiplexed real time qPCR assay as previously described<sup>11</sup>. Briefly, the cycle threshold (Ct) value of a mitochondrial-specific (*ND1*) and nuclear-specific (*RPPH1*) target were determined in triplicate for each sample. The difference in Ct values ( $\Delta$ Ct) for each replicate represents a raw relative measure of mtDNA-CN. Replicates were removed if they had Ct values for *ND1* > 28, Ct values for *RPPH1* > 5 standard deviations from the mean, or  $\Delta$ Ct values > 3 standard deviations from the mean of the plate. Outlier replicates were identified and excluded for samples with a  $\Delta$ Ct standard deviation > 0.5. The sample was excluded if the  $\Delta$ Ct standard deviation remained > 0.5 after replicate removal. We

corrected for an observed linear increase in  $\Delta\text{Ct}$  value due to the pipetting order of each replicate via linear regression. The mean  $\Delta\text{Ct}$  across all replicates was further adjusted for plate effects as a random effect to represent a raw relative measure of mtDNA-CN.

### Microarray

mtDNA-CN was determined using the Genvisis<sup>15</sup> software package for both the Affymetrix Genome-Wide Human SNP Array 6.0 and the Illumina HumanExome BeadChip genotyping array. A list of high-quality mitochondrial SNPs were hand-curated by employing BLAST to remove SNPs without a perfect match to the annotated mitochondrial location and SNPs with off-target matches longer than 20bp. The probe intensities of the remaining mitochondrial SNPs (25 Affymetrix, 58 Illumina Exome Chip) were determined using quantile sketch normalization (apt-probeset-summarize) as implemented in the Affymetrix Power Tools software. The median of the normalized intensity, log R ratio (LRR) for all homozygous calls was GC corrected and used as initial estimates of mtDNA-CN for each sample.

Technical covariates such as DNA quality, DNA quantity, and hybridization efficiency were captured via surrogate variable analysis or principal component analysis as previously described<sup>2</sup>. Surrogate variables or principal components were applied to the BLAST filtered, GC corrected LRR of the remaining autosomal SNPs (43,316 Affymetrix, 47,512 Exome Chip). These autosomal SNPs were selected based on the following quality filters: call rate > 98%, HWE  $p$  value > 0.00001, PLINK mishap for non-random missingness  $p$  value > 0.0001, association with sex  $p$  value > 0.00001, linkage disequilibrium pruning ( $r^2 < 0.30$ ), with maximal spacing between autosomal SNPs of 41.7 kb.

### WES

Whole exome capture was performed using Nimblegen's VChrome2.1 (Roche) and sequencing was performed on the Illumina HiSeq 2000. Sequence reads were aligned using Burrows-Wheeler Aligner (BWA)<sup>16</sup> to the hg19 reference genome. Variant calling, and quality control were performed as previously described<sup>17</sup>. mtDNA-CN was calculated using the mitoAnalyzer software package, which determines the observed ratios of sequence coverages between autosomal and mtDNA<sup>18,19</sup>.

Due to large batch effects observed in our raw mtDNA-CN calls, alignment summary, insert size, quality score, base distribution, sequencing artifact and quality yield metrics were collected using Picard tools (version 1.87) to take into account differences in capture efficiency as well as sequencing and alignment quality<sup>20</sup>. Picard sequencing summary metrics to incorporate into our final model were selected through a stepwise backwards elimination model (Supp. Table 1).

## WGS

Whole genome sequencing data was generated at the Baylor College of Medicine Human Genome Sequencing Center using Nano or PCR-free DNA libraries on the Illumina HiSeq 2000. Sequence reads were mapped to the hg19 reference genome using BWA<sup>16</sup>. Variant calling and quality control were performed as previously described<sup>21</sup>. A count for the total number of reads in a sample was scraped from the NCBI sequence read archive using the R package RCurl<sup>22</sup> while reads aligned to the mitochondrial genome were downloaded directly through Samtools (version 1.3.1). A raw measure of mtDNA-CN was calculated as the ratio of mitochondrial reads to the number of total aligned reads. Unlike WES, we did not observe large batch effects in our WGS raw mtDNA-CN calls, obviating the need for adjustment for Picard sequencing summary metrics.

## *Cardiovascular Disease Definition and Adjudication*

Event adjudication through 2017 in ARIC and 2015 in MESA consisted of expert committee review of death certificates, hospital records and telephone interviews. Incident cardiovascular disease (CVD) was defined as either incident coronary artery disease (CAD) or incident stroke. Incident CAD was defined as first incident MI or death owing to CAD while incident stroke was defined as first nonfatal stroke or death due to stroke. Individuals in ARIC with prevalent CVD at baseline were excluded from incident analyses.

### *Genotyping and Imputation*

Genotype calling for the WBC count locus was derived from the Affymetrix Genome-wide Human SNP Array 6.0 in ARIC and MESA. Haplotype phasing for both cohorts was performed using Shapelt<sup>23</sup> and imputation was performed using IMPUTE2<sup>24</sup>. Genotypes were imputed to the 1000G reference panel (Phase I, version 3). Imputation quality for the Duffy locus lead SNP (rs2814778) was 0.946 and 0.92 in ARIC and MESA, respectively.

### *DNA extraction method*

All DNA used in the DNA extraction comparison were derived from HEK293T cells grown in a single 150T flask to minimize variation due to clonality and cell culture procedures. Extraction were performed with 15 replicates each containing one million cells. mtDNA-CN was determined using qPCR as described previously. To account for the inherent variability in mtDNA-CN estimation, qPCR was run in triplicate.

### Silica-based Column Extraction

We performed a silica-based column extraction using the AllPrep DNA/RNA Mini Kit (Qiagen) according to the manufacturer's instructions for fewer than  $5 \times 10^6$  cells. Briefly, HEK293T cells were lysed and the subsequent lysate was pipetted directly onto the DNA Allprep spin column for homogenization and DNA binding. The bound DNA was then washed and eluted.



### Organic Solvent Extraction

An aliquot of cells were lysed with 350  $\mu$ L of RLT Plus Buffer (Qiagen) and one volume of phenol:chloroform:isoamyl alcohol (25:24:1) (PCIAA) was added to the sample and mixed until it turned milky white. The solution was centrifuged and the upper aqueous phase containing DNA was transferred to a separate tube. We proceeded with an ethanol precipitation protocol using 3M sodium acetate to complete the DNA extraction.

### Direct Cell Lysis

Cells were pelleted at 500g for 5 minutes and the supernatant was removed. The cell pellet was agitated in 100  $\mu$ L of QuickExtract DNA Solution (Lucigen) to disrupt the pellet and placed in a thermocycler for 15 minutes at 68°C followed by 10 minutes at 95°C. The cell lysate was then centrifuged at 17,000g for 15 minutes to pellet any insoluble inhibitors and the supernatant was transferred to a clean tube. The supernatant containing DNA was finally diluted 1:30 with water to limit the impact of any soluble inhibitors on qPCR.

### *Statistical Analyses*

Our final mtDNA-CN phenotype for all measurement techniques is represented as the standardized residuals from a linear model adjusting the raw measure of mtDNA-CN for age, sex, DNA collection center, and technical covariates. Additionally, mtDNA-CN in ARIC was adjusted for WBC count, and the 14.9% of individuals with missing WBC data were imputed to the mean. WBC was not available in MESA for the same visit in which the DNA was obtained. As mtDNA-CN was standardized, the effect size estimates are in units of standard deviations, with positive betas corresponding to an increase in mtDNA-CN.

For analyses involving outcomes which also served as covariates in our final phenotype model (age, sex, WBC count), mtDNA-CN was calculated using the full model minus the outcome variable. For example, when exploring the relationship between mtDNA-CN and age, our mtDNA-CN phenotype would represent the standardized residuals from a model controlling for sex, sample collection center, WBC count and any technical covariates. We would then use this phenotype to explore the association between age and mtDNA-CN such that effect sizes for all comparisons remain in standard deviation units.

Single SNP regression for mtDNA-CN on the WBC count locus was performed in blacks with FAST<sup>25</sup>. In ARIC, mtDNA-CN not adjusted for WBC count was used as the independent variable. Single SNP regression models were additionally adjusted for age, sex, sample collection site, and genotyping PCs.

Cox-proportional hazards regression was used to estimate hazard ratios (HRs) for incident CVD outcomes. Follow-up time was defined from DNA collection through death, loss to follow-up, or study end point (through 2017 in ARIC and 2015 in MESA).

Pairwise F-tests were used to test the null hypothesis that the ratio of variances between the DNA extraction methods is equal to one.

All statistical analyses were performed using R (version 3.3.3).

## **Results**

The study included 1,085 participants from ARIC with mtDNA-CN data from the Affymetrix 6.0 microarray, the Illumina Exome Chip microarray, WES, and WGS while MESA included 3,489 participants with mtDNA-CN data available from qPCR, the Affymetrix 6.0 microarray, and the

Illumina Exome Chip microarray (combined N = 4,574). The mean age of study participants was 61.4 years (ARIC, 57.1 years; MESA 62.7 years), 55.3% of participants were female (n = 2,528), and 46.4% of participants were black (n = 2,124) (Table 1). While the Affymetrix and Illumina Exome Chip arrays were run in both cohorts, at the time of analysis WES and WGS were unique to ARIC and qPCR was unique to MESA.

#### *mtDNA-CN Estimation Method Comparison*

To determine the optimal method for measuring mtDNA-CN, we ranked the performance of each technique based on strength of the association, as measured by  $p$  values, with the relevant mtDNA-CN correlate (Supp. Table 2). Kendall's  $W$  tests<sup>26</sup> show significant agreement in rankings across correlates in ARIC ( $p = 0.0019$ , Kendall's  $W = 0.79$ ) and MESA ( $p = 0.036$ , Kendall's  $W = 0.82$ ) with WGS and the Affymetrix array performing best for each measure in ARIC and MESA, respectively (Table 2).

To additionally quantify performance, we created a scoring system for each method using negative log transformed  $p$  values standardized to the least significant method for each correlate. These values were then summed across the correlates for each method to achieve an overall rating of performance (Supp. Table 3). These ratings were compared to 1,000 permutations of a random sampling of the standardized and transformed  $p$  values for each correlate across the different estimation techniques. In ARIC, WGS had a significantly higher performance score compared to all other methods ( $p < 0.002$ ) while the Illumina Exome Chip had a significantly lower score ( $p = 0.03$ ) (Supp Fig 1A). In MESA, Affymetrix had a significantly higher score than qPCR and the Illumina Exome Chip ( $p = 0.002$ ) (Supp Fig 1B). When removing the contribution of WGS in ARIC, the Affymetrix array had a significantly higher score than the Illumina Exome Chip and WES ( $p = 0.01$ ) (Supp Fig 1C).

As WGS and Affymetrix performed similarly, we sought to further parse out their performance by evaluating the 2,746 ARIC samples which contained mtDNA-CN from both platforms. On average, WGS performed 2.2 orders of magnitude more significantly than the Affymetrix array (Supp Table 4).

### *DNA Extraction Comparison*

Raw mitochondrial estimates from qPCR were mean-zeroed to the plate average and the mean value across the triplicate plates was used to determine the variance across the 15 replicates for each method (Fig 1). The variance for our novel Lyse method was significantly lower at 0.02 compared to 0.17 and 0.59 for the PCIAA and Qiagen Kit extractions respectively ( $F = 0.13$ ,  $p = 5.44 \times 10^{-4}$ ;  $F = 0.04$ ,  $p = 2.82 \times 10^{-7}$ ). Additionally, our findings support previous work<sup>14</sup> demonstrating PCIAA had significantly lower variability compared to the Qiagen Kit ( $F = 0.29$ ,  $p = 0.03$ ).

### **Discussion**

We explored several methods for measuring mtDNA-CN in 4,574 self-identified white and black participants from the ARIC and MESA studies. We found mtDNA-CN estimated from WGS read counts and Affymetrix Genome-Wide Human SNP Array 6.0 probe intensities was more significantly associated with known mtDNA-CN correlates compared to mtDNA-CN estimated from WES, qPCR and the Illumina HumanExome BeadChip. When observing the relative performance of these methods, mtDNA-CN calculated from either WGS or Affymetrix array are, respectively, 5.6 and 5.4 orders of magnitude more significant than the current gold standard of qPCR (Fig 2). These results are not limited to significance as we see similar trends when exploring effect size estimates (Fig 3). For example, when looking at incident CVD, mtDNA-CN measured from WGS observes a substantial HR of 0.63 (0.54 – 0.74) where as mtDNA-CN measured from qPCR only has a HR of 0.93 (0.82 – 1.05), a marked difference. As a result,

when exploring the relationship between mtDNA-CN and a trait of interest, on average one could expect a result 5.6 orders of magnitude less significant and 6 times less extreme when using mtDNA-CN estimated from qPCR data as opposed to WGS.

Interestingly, mtDNA-CN measured from two seemingly similar microarray platforms differed drastically (Supp. Fig 2). However, this finding is unsurprising when exploring the underlying biochemistry of sample preparation for each microarray platform. While the Affymetrix protocol starts with two restriction enzyme digests prior to whole genome amplification (WGA), the Illumina Exome Chip requires WGA with a processive polymerase prior to sonication. As a result, the mitochondrial genome undergoes rolling circle amplification which occurs at a significantly faster rate than linear WGA<sup>27</sup>.

Lower mtDNA-CN has been found to be associated with an increased incidence for several diseases, including end stage renal disease, type 2 diabetes, and non-alcoholic fatty liver disease<sup>28-30</sup>. However, such studies have relied on mtDNA-CN estimated from qPCR data. Our findings suggest much of the current literature may be severely underestimating disease associations with mtDNA-CN as well as its potential as a predictor of disease outcomes. Despite this, at <\$2 per sample qPCR may remain the principal method for measuring mtDNA-CN due to the prohibitive costs of WGS. As a result, it may be time for the field to start exploring other low cost methods, such as digital droplet PCR, which may improve upon the accuracy of qPCR<sup>31,32</sup>.

We additionally showed DNA extraction method affects mtDNA-CN estimate reproducibility with copy number measured directly from cell lysate significantly outperforming silica-based column extraction and organic solvent extraction. Although several other studies have explored the impact of DNA isolation protocol on mtDNA-CN estimation<sup>14,33,34</sup>, to our knowledge, this is the

first study to interrogate the possibility of measuring mtDNA-CN directly from cell lysate. In addition to the superior performance of direct cell lysis, this method is cheaper and has less hands-on time than PCIAA or Qiagen Kit extractions. However, the authors recognize DNA from cell lysate has less downstream utility than traditional DNA extraction procedures potentially limiting its adoption within the mtDNA-CN field when sample availability is limited. Furthermore, it is important to note the various DNA extraction methods resulted in significantly different mtDNA-CN estimates ( $p = 3.56 \times 10^{-11}$ , 0.02,  $2.85 \times 10^{-7}$  for Lyse:PCIAA, Lyse:Qiagen Kit, and PCIAA:Qiagen Kit respectively). As such, when choosing an extraction method, it is important to remain consistent across the study.

In conclusion, our study demonstrates mtDNA-CN calculated from WGS reads or Affymetrix microarray probe intensities significantly improves upon the current gold standard method of qPCR. Furthermore, we show direct cell lysis introduces less variability to mtDNA-CN estimates than popular DNA extraction methods. Despite the relative infancy of using mtDNA-CN as a novel risk marker, these findings highlight the need for the field to adapt to current technologies to ensure disease and trait associations are fully realized with a move toward more accurate microarray and WGS methods. Furthermore, due to the prevalence of qPCR in the literature, the authors recommend re-analyzing trait associations as more WGS data becomes available from large initiatives such as the Trans-Omics for Precision Medicine program.

## References

1. Gómez-Serrano, M., Camafeita, E., Loureiro, M. & Peral, B. Mitoproteomics: Tackling Mitochondrial Dysfunction in Human Disease. *Oxid. Med. Cell. Longev.* **2018**, (2018).
2. Ashar, F. N. *et al.* Association of Mitochondrial DNA Copy Number With Cardiovascular Disease. *JAMA Cardiol.* **2**, 1247–1255 (2017).
3. Chen, S. *et al.* Association between leukocyte mitochondrial DNA content and risk of coronary heart disease: A case-control study. *Atherosclerosis* **237**, 220–226 (2014).
4. Pyle, A. *et al.* Reduced mitochondrial DNA copy number is a biomarker of Parkinson's disease. *Neurobiol. Aging* **38**, 216.e7-216.e10 (2016).
5. Wei, W. *et al.* Mitochondrial DNA point mutations and relative copy number in 1363 disease and control human brains. *Acta Neuropathol. Commun.* **5**, (2017).
6. Reznik, E. *et al.* Mitochondrial DNA copy number variation across human cancers. *eLife* **5**,
7. Hertweck, K. L. & Dasgupta, S. The Landscape of mtDNA Modifications in Cancer: A Tale of Two Cities. *Front. Oncol.* **7**, 262 (2017).
8. Thyagarajan, B., Wang, R., Barcelo, H., Koh, W.-P. & Yuan, J.-M. Mitochondrial copy number is associated with colorectal cancer risk. *Cancer Epidemiol. Biomark. Prev. Publ. Am. Assoc. Cancer Res. Cosponsored Am. Soc. Prev. Oncol.* **21**, 1574–1581 (2012).
9. Knez, J. *et al.* Correlates of Peripheral Blood Mitochondrial DNA Content in a General Population. *Am. J. Epidemiol.* **183**, 138–146 (2016).
10. Tin, A. *et al.* Association between Mitochondrial DNA Copy Number in Peripheral Blood and Incident CKD in the Atherosclerosis Risk in Communities Study. *J. Am. Soc. Nephrol. JASN* **27**, 2467–2473 (2016).
11. Ashar, F. N. *et al.* Association of mitochondrial DNA levels with frailty and all-cause mortality. *J. Mol. Med. Berl. Ger.* **93**, 177–186 (2015).
12. Google Scholar. Search Terms: 'mitochondrial DNA copy number', 'mitochondrial DNA content'. Available at: <https://scholar.google.com>. (Accessed: 21st February 2019)

13. Cai, N. *et al.* Genetic Control over mtDNA and Its Relationship to Major Depressive Disorder. *Curr. Biol.* **25**, 3170–3177 (2015).
14. Guo, W., Jiang, L., Bhasin, S., Khan, S. M. & Swerdlow, R. H. DNA Extraction Procedures Meaningfully Influence qPCR-Based mtDNA Copy Number Determination. *Mitochondrion* **9**, 261–265 (2009).
15. MitoPipeline: Generating Mitochondrial copy number estimates from SNP array data in Genvisis. Available at: <http://genvisis.org/MitoPipeline/>. (Accessed: 27th November 2017)
16. Li, H. & Durbin, R. Fast and accurate short read alignment with Burrows–Wheeler transform. *Bioinformatics* **25**, 1754–1760 (2009).
17. Yu, B. *et al.* Association of Rare Loss-Of-Function Alleles in HAL, Serum Histidine Levels and Incident Coronary Heart Disease. *Circ. Cardiovasc. Genet.* **8**, 351–355 (2015).
18. Ding, J. *et al.* Assessing Mitochondrial DNA Variation and Copy Number in Lymphocytes of ~2,000 Sardinians Using Tailored Sequencing Analysis Tools. *PLOS Genet.* **11**, e1005306 (2015).
19. Qian, Y. *et al.* fastMitoCalc: an ultra-fast program to estimate mitochondrial DNA copy number from whole-genome sequences. *Bioinformatics* **33**, 1399–1401 (2017).
20. Picard Tools - By Broad Institute. Available at: <https://broadinstitute.github.io/picard/>. (Accessed: 4th January 2019)
21. Morrison, A. C. *et al.* Whole Genome Sequence-Based Analysis of a Model Complex Trait, High Density Lipoprotein Cholesterol. *Nat. Genet.* **45**, 899–901 (2013).
22. Duncan Temple Lang and the CRAN team (2018). RCurl: General Network (HTTP/FTP/...) Client Interface for R. R package version 1.95-4.11. <https://CRAN.R-project.org/package=RCurl>.
23. Delaneau, O., Zagury, J.-F. & Marchini, J. Improved whole-chromosome phasing for disease and population genetic studies. *Nat. Methods* **10**, 5–6 (2013).



24. Howie, B., Fuchsberger, C., Stephens, M., Marchini, J. & Abecasis, G. R. Fast and accurate genotype imputation in genome-wide association studies through pre-phasing. *Nat. Genet.* **44**, 955–959 (2012).
25. Chanda, P., Huang, H., Arking, D. E. & Bader, J. S. Fast Association Tests for Genes with FAST. *PLOS ONE* **8**, e68585 (2013).
26. Gouhier, T. C. & Guichard, F. Synchrony: quantifying variability in space and time. *Methods Ecol. Evol.* **5**, 524–533 (2014).
27. Dean, F. B., Nelson, J. R., Giesler, T. L. & Lasken, R. S. Rapid Amplification of Plasmid and Phage DNA Using Phi29 DNA Polymerase and Multiply-Primed Rolling Circle Amplification. *Genome Res.* **11**, 1095–1099 (2001).
28. Zhang, Y. *et al.* Associations of mitochondrial haplogroups and mitochondrial DNA copy numbers with end-stage renal disease in a Han population. *Mitochondrial DNA Part A* **28**, 725–731 (2017).
29. Lee, H. K. *et al.* Decreased mitochondrial DNA content in peripheral blood precedes the development of non-insulin-dependent diabetes mellitus. *Diabetes Res. Clin. Pract.* **42**, 161–167 (1998).
30. Sookoian, S. *et al.* Epigenetic regulation of insulin resistance in nonalcoholic fatty liver disease: Impact of liver methylation of the peroxisome proliferator–activated receptor  $\gamma$  coactivator 1 $\alpha$  promoter. *Hepatology* **52**, 1992–2000 (2010).
31. Memon, A. A. *et al.* Quantification of mitochondrial DNA copy number in suspected cancer patients by a well optimized ddPCR method. *Biomol. Detect. Quantif.* **13**, 32–39 (2017).
32. Ye, W. *et al.* Accurate quantitation of circulating cell-free mitochondrial DNA in plasma by droplet digital PCR. *Anal. Bioanal. Chem.* **409**, 2727–2735 (2017).
33. Hurtado-Roca, Y. *et al.* Adjusting MtDNA Quantification in Whole Blood for Peripheral Blood Platelet and Leukocyte Counts. *PLOS ONE* **11**, e0163770 (2016).

34. Nacheva, E. *et al.* DNA isolation protocol effects on nuclear DNA analysis by microarrays, droplet digital PCR, and whole genome sequencing, and on mitochondrial DNA copy number estimation. *PLoS ONE* **12**, (2017).

### **Author Contributions**

Dr Arking had full access to all the data in the study and takes responsibility for the integrity of the data and the accuracy of the data analysis.

*Concept and design:* Longchamps, Guallar, Pankratz, Arking.

*Acquisition, analysis, or interpretation of data:* Longchamps, Castellani, Newcomb, Sumpter, Lane, Grove, Guallar, Pankratz, Taylor, Rotter, Boerwinkle, Arking.

*Drafting of the manuscript:* Longchamps, Arking.

*Critical revision of the manuscript for important intellectual content:* Longchamps, Castellani, Newcomb, Sumpter, Lane, Grove, Guallar, Pankratz, Taylor, Rotter, Boerwinkle, Arking.

*Statistical analysis:* Longchamps, Castellani, Lane, Guallar, Pankratz, Arking.

*Obtained funding:* Guallar, Rotter, Boerwinkle, Arking.

*Administrative, technical, or material support:* Newcomb, Sumpter, Grove, Rotter.

*Supervision:* Guallar, Pankratz, Rotter, Arking.

### **Funding/Support**

This research was supported by grant R01HL131573 from the US National Institutes of Health (Longchamps, Castellani, Guallar, and Arking) and by grant P30AG021334 from the Johns Hopkins University Claude D. Pepper Older Americans Independence Center National Institute on Aging (Dr Arking). The Atherosclerosis Risk in Communities study has been funded in whole or in part with Federal funds from the National Heart, Lung, and Blood Institute, National Institutes of Health, Department of Health and Human Services, under Contract nos. (HHSN268201700001I, HHSN268201700002I, HHSN268201700003I, HHSN268201700005I, HHSN268201700004I). The Multi-Ethnic Study of Atherosclerosis is supported by contracts HHSN268201500003I, N01-HC-95159, N01-HC-95160, N01-HC-95161, N01-HC-95162, N01-HC-95163, N01-HC-95164, N01-HC-95165, N01-HC-95166, N01-HC-95167, N01-HC-95168 and N01-HC-95169 from the National Heart, Lung, and Blood Institute, and by grants UL1-TR-000040, UL1-TR-001079, and UL1-TR-001420 from the National Center for Advancing Translational Sciences (NCATS). Dr. Rotter and Dr. Taylor's efforts were supported in part by the National Center for Advancing Translational Sciences, CTSI grant UL1TR001881, and the National Institute of Diabetes and Digestive and Kidney Disease Diabetes Research Center (DRC) grant DK063491 to the Southern California Diabetes Endocrinology Research Center. Funding for SHARe genotyping was provided by National Heart, Lung, and Blood Institute contract N02-HL-64278.

### **Role of the Funder/Sponsor**

The funding organizations had no role in the design and conduct of the study; collection, management, analysis, and interpretation of the data; preparation, review, or approval of the manuscript; and decision to submit the manuscript for publication.

### **Disclaimer**

The content is solely the responsibility of the authors and does not necessarily represent the official views of the National Institutes of Health.

### **Additional Contributions**

We thank the staff and participants of the Atherosclerosis Risk in Communities Study, Cardiovascular Health Study, and the Multi-Ethnic Study of Atherosclerosis studies for their important contributions. A full list of participating MESA investigators and institutions can be found at <http://www.mesa-nhlbi.org>.

### **Competing Interests**

There are no competing interests to report.

**Table 1.** Participant Characteristics

| Participant Characteristics     | ARIC       | MESA         |
|---------------------------------|------------|--------------|
| n                               | 1,085      | 3,489        |
| Sex (female)                    | 672 (61.9) | 1,856 (53.2) |
| Ethnicity (black)               | 958 (88.3) | 1,226 (35.1) |
| Age                             | 57.1 ± 5.9 | 62.7 ± 10.2  |
| WBC count (10 <sup>3</sup> /μl) | 5.8 ± 1.7  | NA           |
| Incident CVD                    | 174 (16.0) | 270 (7.7)    |

Values are number (%) or mean ± SD

Abbreviations: SD, standard deviation; WBC, white blood cell;

CVD, cardiovascular disease

**Table 2.** Performance Rankings for mtDNA-CN Estimation Methods

| Cohort | Assay | Age | Sex | WBC | Duffy locus* | Incident CVD | Mean Rank | Kendall's W <i>p</i> value |
|--------|-------|-----|-----|-----|--------------|--------------|-----------|----------------------------|
| ARIC   | Exome | 2   | 4   | 3   | 4            | 4            | 3.4       | 0.001                      |
|        | Affy  | 3   | 2   | 2   | 2            | 2            | 2.2       |                            |
|        | WES   | 4   | 3   | 4   | 3            | 3            | 3.4       |                            |
|        | WGS   | 1   | 1   | 1   | 1            | 1            | 1         |                            |
| MESA   | Exome | 2   | 3   | NA  | 2.5          | 3            | 2.625     | 0.03                       |
|        | Affy  | 1   | 1   | NA  | 1            | 1            | 1         |                            |
|        | qPCR  | 3   | 2   | NA  | 2.5          | 2            | 2.375     |                            |

\*Duffy locus associations were performed in blacks only

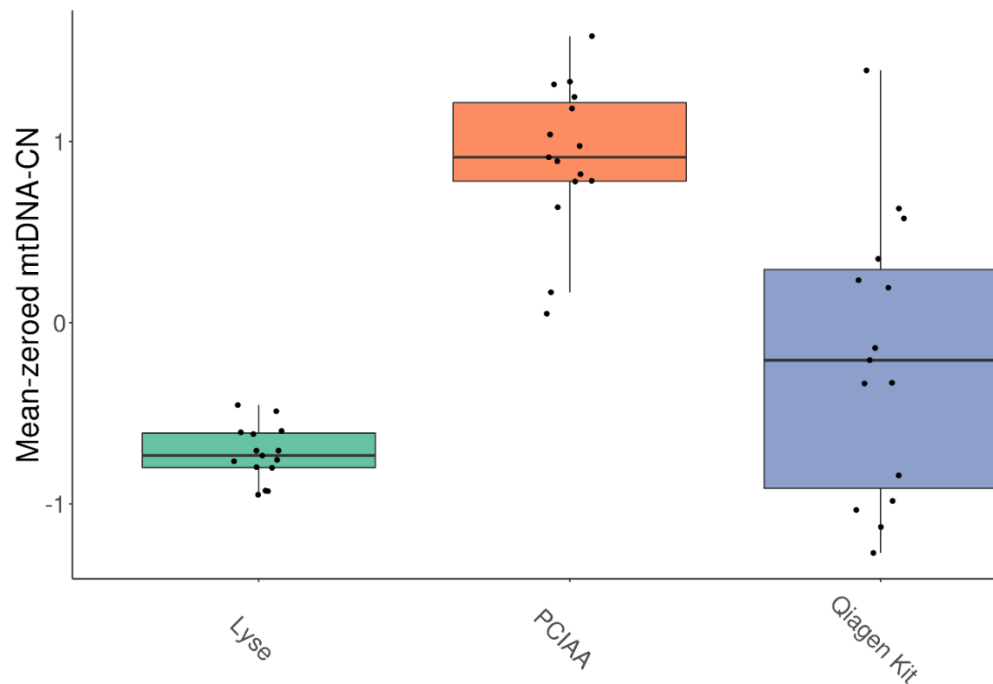

**Figure 1. mtDNA-CN measured across DNA extraction methods.**

mtDNA-CN measured by qPCR was mean-zeroed and averaged across three runs for Lyse, PCIAA and Qiagen Kit DNA extractions. Variance for Lyse, PCIAA and Qiagen Kit are 0.02, 0.17 and 0.59 respectively. PCIAA, phenol:chloroform:isoamyl alcohol.

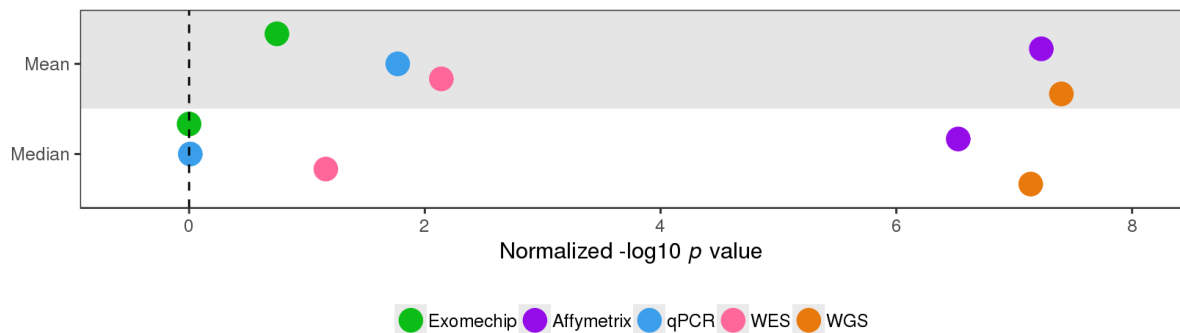

**Figure 2. Relative overall performance of mtDNA-CN estimation methods**

Overall performance for each method scored as mean or median of the negative log-transformed  $p$  value across all correlates normalized to the least significant method of each correlate. For ExomeChip and Affymetrix, the mean value across both cohorts was used as the final measure of performance.

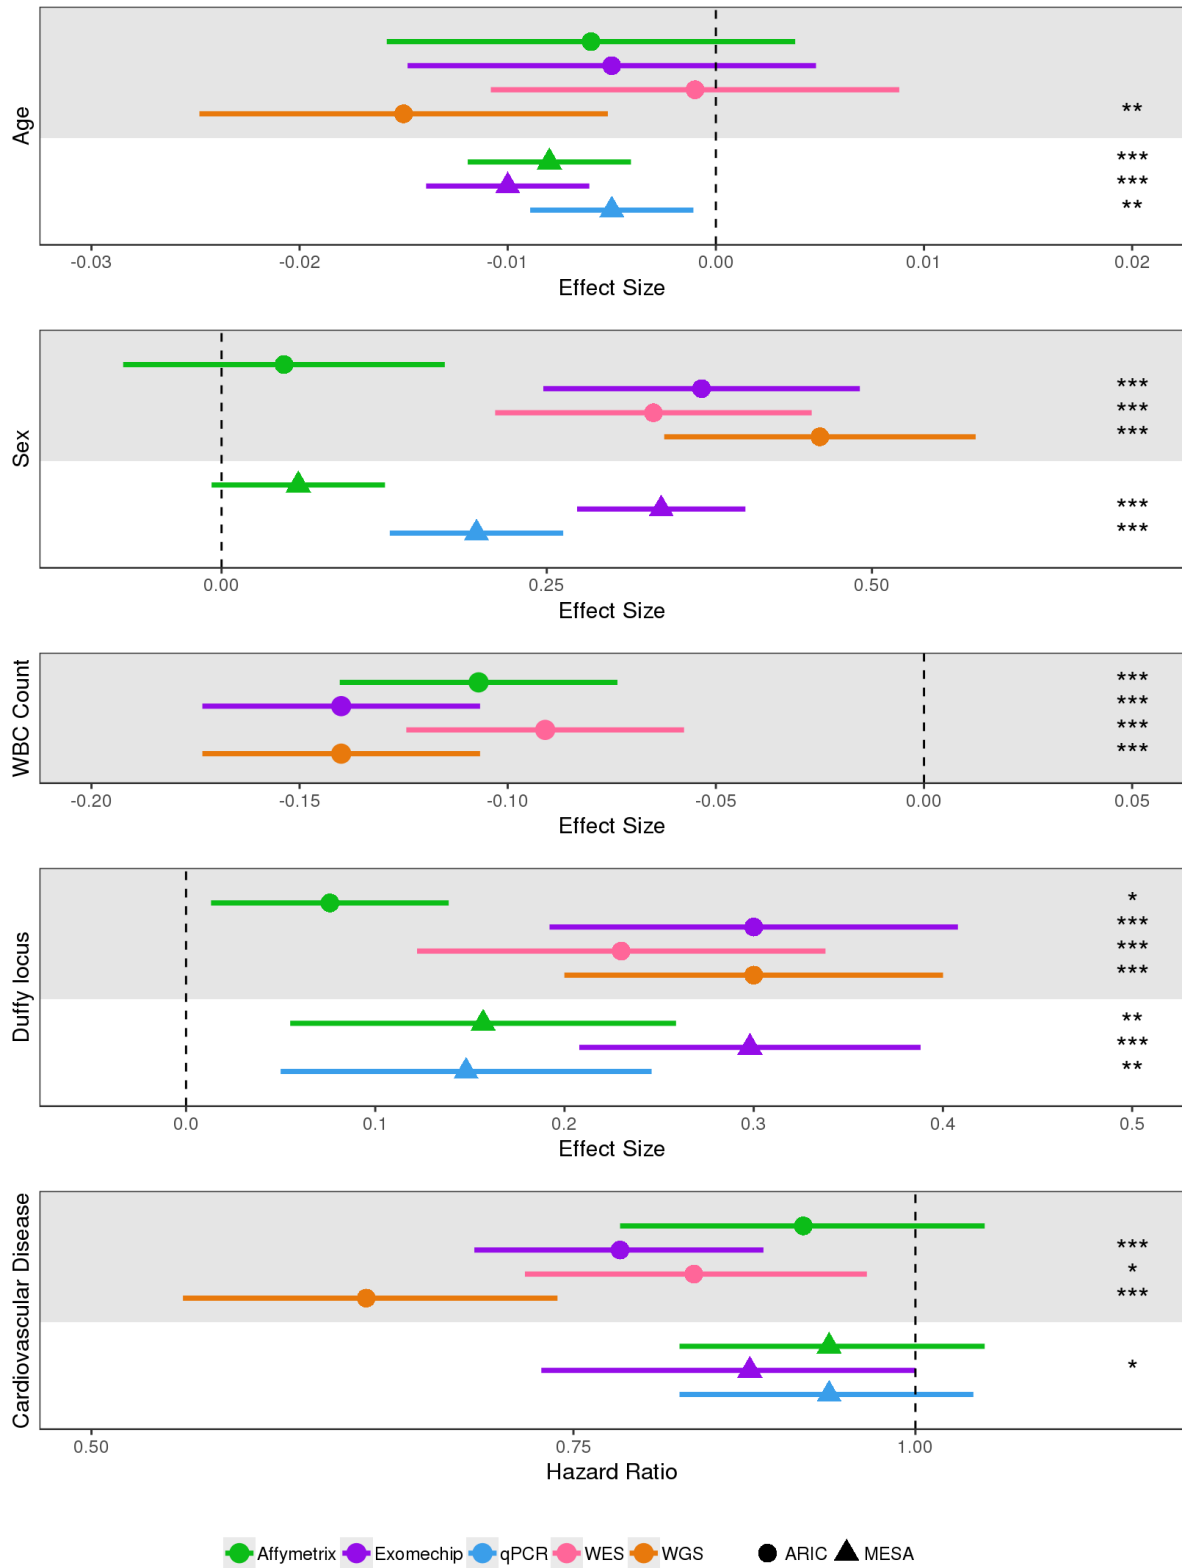

**Figure 3. Effect size and Hazard Ratio estimates for mtDNA-CN with known correlates.**

Data points and their corresponding 95% confidence intervals represent the effect size or Hazard Ratio estimates for mtDNA-CN with Age, Sex, WBC count, Duffy locus, and incident Cardiovascular Disease. Effect size estimates are in standard deviation units. The significance of each estimate is represented as '\*' for  $P < 0.05$ , '\*\*' for  $P < 0.01$ , and '\*\*\*' for  $P < 0.001$ . WBC, white blood cell. <sup>22</sup>
